# Supplementary material for: Tectonically-triggered sediment and carbon export to the Hadal zone
Source: PubMed Central journal article supplement (PMC5760703; doi:10.1038/s41467-017-02504-1), 2018-01-09
Supplement: 41467_2017_2504_MOESM1_ESM.pdf [file 41467_2017_2504_MOESM1_ESM.pdf]

**Supplementary Table 1.** Bulk and RPO data (TOC content, radiocarbon, and stable carbon isotopic characteristics of bulk OC and thermochemical fractions) in selected samples (A – E) from core GeoB 16431-1.

| No. | Core depth (cm) | TOC (wt %) | Bulk              |                   |                     | T <sub>1</sub> (170-320°C) |                   |                          | T <sub>2</sub> (320-391°C) |                   |                     | T <sub>3</sub> (391-476°C) |                   |                     | T <sub>4</sub> (476-570°C) |                   |                     | T <sub>5</sub> (570-915°C) |                    |                     |
|-----|-----------------|------------|-------------------|-------------------|---------------------|----------------------------|-------------------|--------------------------|----------------------------|-------------------|---------------------|----------------------------|-------------------|---------------------|----------------------------|-------------------|---------------------|----------------------------|--------------------|---------------------|
|     |                 |            | δ <sup>13</sup> C | Fm                | <sup>14</sup> C age | δ <sup>13</sup> C          | Fm                | <sup>14</sup> C age      | δ <sup>13</sup> C          | Fm                | <sup>14</sup> C age | δ <sup>13</sup> C          | Fm                | <sup>14</sup> C age | δ <sup>13</sup> C          | Fm                | <sup>14</sup> C age | δ <sup>13</sup> C          | Fm                 | <sup>14</sup> C age |
| A   | 5-7             | 1.7        | -25.1             | 0.7943<br>±0.0105 | 1850<br>±107        | -23.8                      | 0.8392<br>±0.0018 | 1410 <sup>#</sup><br>±15 | -22.3                      | 0.7747<br>±0.0082 | 2050<br>±85         | -24.4                      | 0.6856<br>±0.0078 | 3032<br>±91         | -26.5                      | 0.6874<br>±0.0073 | 3011<br>±85         | -28.3                      | 0.5649<br>±0.0065  | 4588<br>±93         |
| B   | 352-355         | 1.2        | -28.7             | 0.5222<br>±0.0095 | 5218<br>±146        | -25.3                      | 0.5426<br>±0.0058 | 4912<br>±85              | -24.7                      | 0.5042<br>±0.0054 | 5501<br>±87         | -28.7                      | 0.3962<br>±0.0048 | 7437<br>±97         | -29.4                      | 0.4147<br>±0.0049 | 7071<br>±95         | -30.1                      | 0.3352<br>±0.0044  | 8780<br>±104        |
| C   | 448-451         | 1.5        | -26.2             | 0.6766<br>±0.0101 | 3139<br>±120        | -24.0                      | 0.7032<br>±0.0017 | 2830 <sup>#</sup><br>±20 | -23.2                      | 0.6646<br>±0.0087 | 3282<br>±105        | -21.9                      | 0.5600<br>±0.0057 | 4658<br>±81         | -27.7                      | 0.6091<br>±0.0067 | 3983<br>±88         | -33.2                      | 0.4953 ±<br>0.0060 | 5644<br>±98         |
| D   | 544-548         | 0.6        | -30.9             | 0.3093<br>±0.0088 | 9425<br>±228        | -25.6                      | 0.3132<br>±0.0043 | 9326<br>±111             | -26.7                      | 0.2656<br>±0.0037 | 10648<br>±113       | -28.0                      | 0.2200<br>±0.0040 | 12164<br>±145       | -36.5                      | 0.2319<br>±0.0037 | 11740<br>±127       | -33.2                      | 0.1850<br>±0.0044  | 13553<br>±193       |
| E   | 615-618         | 1.6        | -27.5             | 0.6691<br>±0.0102 | 3228<br>±122        | -23.4                      | 0.6929<br>±0.0020 | 2950 <sup>#</sup><br>±25 | -21.9                      | 0.6357<br>±0.0063 | 3639<br>±79         | -25.2                      | 0.5481<br>±0.0056 | 4830<br>±82         | -25.6                      | 0.5270<br>±0.0057 | 5145<br>±86         | -25.2                      | 0.4876<br>±0.0059  | 5770<br>±97         |

Note: # indicates that samples were measured at NOSAMS.

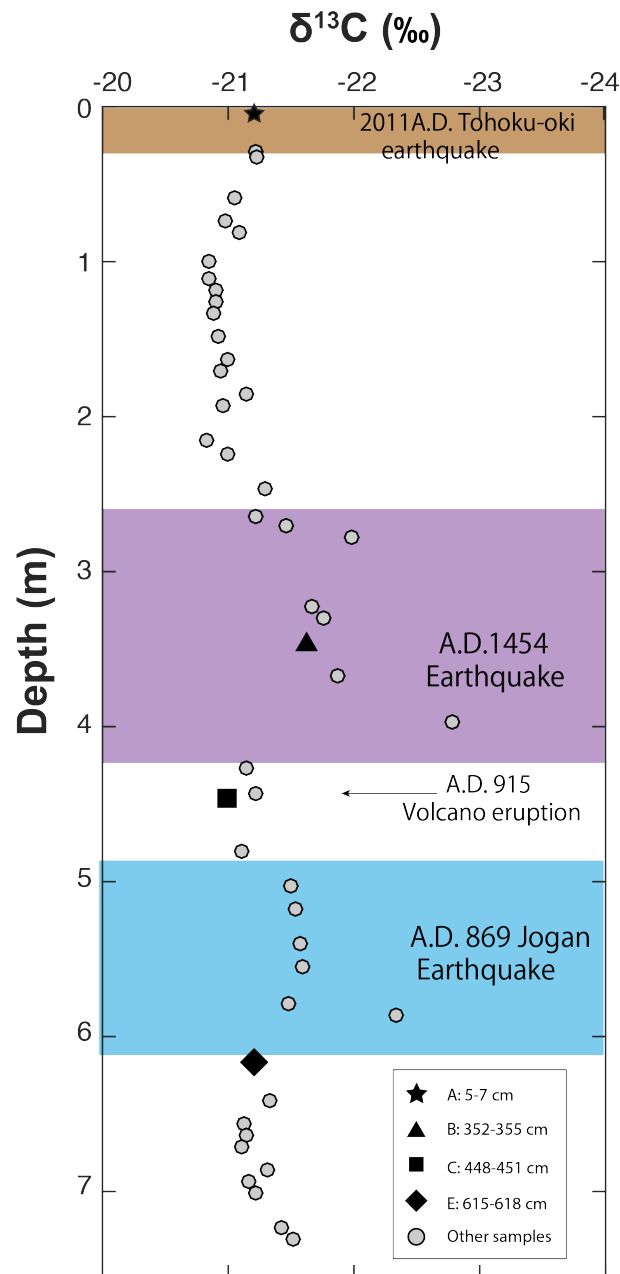

**Supplementary Figure 1.** Bulk OC  $\delta^{13}\text{C}$  profile of Core GeoB 16431-1 ( $n = 47$ ). The  $\delta^{13}\text{C}$  of sample D was not gained due to its measurement failure. The samples for OC  $^{13}\text{C}$  analysis in Ag capsules were first fumigated (37% HCl for 72 hrs) and measured with a  $\pm 0.2$  ‰ precision using a coupled elemental analyzer (EA) / IRMS / AMS online system at ETH Zürich (McIntyre et al., 2016).

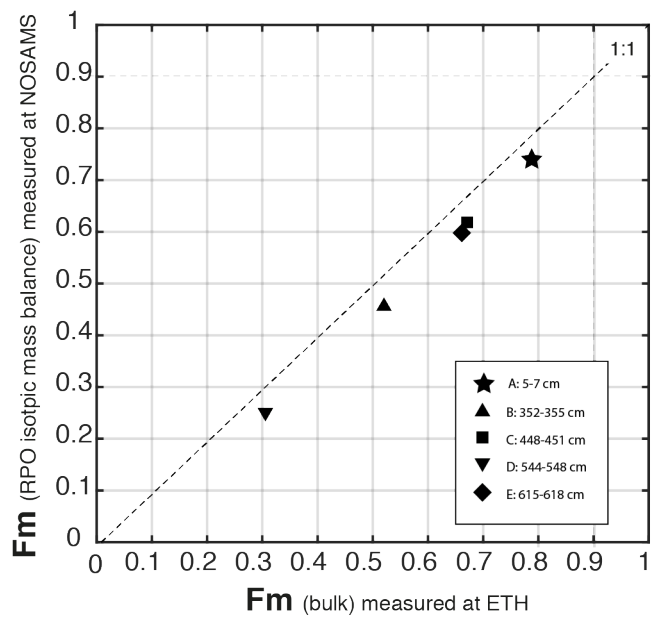

**Supplementary Figure 2.** Isotopic relationship between calculated (from RPO isotopic mass balance) and measured bulk values for  $F_m$  values at NOSAMS and ETH, respectively.

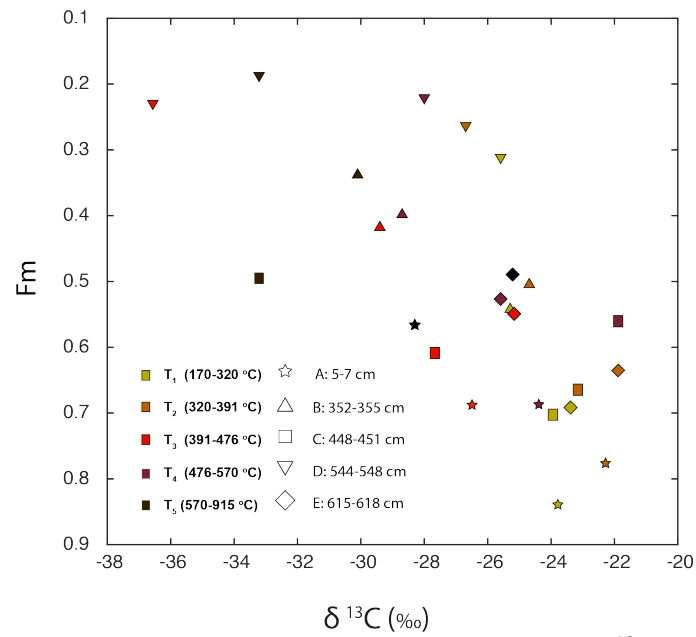

**Supplementary Figure 3.** Cross-plot between Fm values and  $\delta^{13}\text{C}$  data of RPO fractions (T<sub>1</sub>-T<sub>5</sub>) among the five samples.

**Supplementary reference:**

1. McIntyre, C. P. et al. Online <sup>13</sup>C and <sup>14</sup>C gas measurements by EA-IRMS-AMS at ETH Zürich. *Radiocarbon* **58**, 1-7 (2016).
