# Supplementary material for: Tectonically-triggered sediment and carbon export to the Hadal zone
Source: PubMed Central journal article supplement (PMC5760703; doi:10.1038/s41467-017-02504-1), 2018-01-09
Supplement: 41467_2017_2504_MOESM3_ESM.pdf [file 41467_2017_2504_MOESM3_ESM.pdf]

## **Description of Additional Supplementary Files**

File Name: Supplementary Data 1

Description: High-resolutions data (bulk radiocarbon, TOC content, density, and calculated sedimentation rate and OC fluxes) from core Geob 16431-1.
